# Supplementary material for: Effects of Climatic Change on Potential Distribution of Spogostylum ocyale (Diptera: Bombyliidae) in the Middle East Using Maxent Modelling
Source: MDPI journal article supplement (doi:10.3390/insects14020120), 2023-01-24
Supplement: s1 [file s1]

**Table S2.** Performance evaluation of the MaxEnt model using area under the ROC curve “AUC” and true skilled statistics (TSS).

| Model replicate  | AUC <sup>1</sup>   |                   | True Skill Statistic (TSS) <sup>2</sup> |
|------------------|--------------------|-------------------|-----------------------------------------|
|                  | Training           | Test              |                                         |
| 1                | 0.846              | 0.8416            | 0.686                                   |
| 2                | 0.835              | 0.93              | 0.862                                   |
| 3                | 0.853              | 0.7781            | 0.467                                   |
| 4                | 0.841              | 0.8389            | 0.566                                   |
| 5                | 0.868              | 0.6268            | 0.485                                   |
| 6                | 0.853              | 0.785             | 0.578                                   |
| 7                | 0.842              | 0.8946            | 0.694                                   |
| 8                | 0.84               | 0.9141            | 0.657                                   |
| 9                | 0.844              | 0.8727            | 0.555                                   |
| 10               | 0.847              | 0.8569            | 0.509                                   |
| Average $\pm$ SD | 0.8471 $\pm$ 0.009 | 0.834 $\pm$ 0.088 | 0.606 $\pm$ 0.120                       |

<sup>1</sup>The area under the curve (AUC) has scores varying between 0 and 1, and values  $\geq 0.7$  are considered acceptable [39].

<sup>2</sup>True skilled statistics (TSS) scores vary from -1 to 1, and values  $\geq 0.5$  indicate acceptable models [40].
