# Supplementary material for: Effects of Climatic Change on Potential Distribution of Spogostylum ocyale (Diptera: Bombyliidae) in the Middle East Using Maxent Modelling
Source: MDPI journal article supplement (doi:10.3390/insects14020120), 2023-01-24
Supplement: s1 [file s1]

**Table S1.** Correlation test of variables that showed any contribution to *Spogostylum ocyale* distribution by SDMToolbox v2.5 in ArcMap 10.7 (Universal tool; Remove highly correlated variables).

| variables | Bio2  | Bio3  | Bio4    | Bio5  | Bio6   | Bio7   | Bio8   | Bio9   | Bio10  | Alt     |
|-----------|-------|-------|---------|-------|--------|--------|--------|--------|--------|---------|
| Bio1      | 0.126 | 0.544 | -0.55   | 0.725 | 0.913* | -0.469 | 0.851* | 0.293  | 0.838* | -0.628  |
| Bio2      |       | 0.322 | 0.098   | 0.414 | -0.149 | 0.449  | 0.176  | -0.118 | 0.183  | -0.0009 |
| Bio3      |       |       | -0.890* | 0.044 | 0.664  | -0.680 | 0.707  | -0.351 | 0.067  | -0.158  |
| Bio4      |       |       |         | 0.122 | -0.784 | 0.925* | -0.712 | 0.338  | -0.013 | 0.188   |
| Bio5      |       |       |         |       | 0.424  | 0.246  | 0.437  | 0.589  | 0.950* | -0.541  |
| Bio6      |       |       |         |       |        | -0.773 | 0.835* | 0.149  | 0.595  | -0.553  |
| Bio7      |       |       |         |       |        |        | -0.587 | 0.252  | 0.029  | 0.212   |
| Bio8      |       |       |         |       |        |        |        | -0.106 | 0.538  | -0.393  |
| Bio9      |       |       |         |       |        |        |        |        | 0.603  | -0.334  |
| Bio10     |       |       |         |       |        |        |        |        |        | -0.624  |

Shaded variables were removed because of high cross-correlations. The priority in our choice between correlated variables was for those represent the original input climate data and are not derived from several layers or a subset of the data (such as: Bio1 and Bio2). \* The threshold for correlation was 0.8.
