# Supplementary material for: Effects of Climatic Change on Potential Distribution of Spogostylum ocyale (Diptera: Bombyliidae) in the Middle East Using Maxent Modelling
Source: MDPI journal article supplement (doi:10.3390/insects14020120), 2023-01-24
Supplement: s1 [file s1]

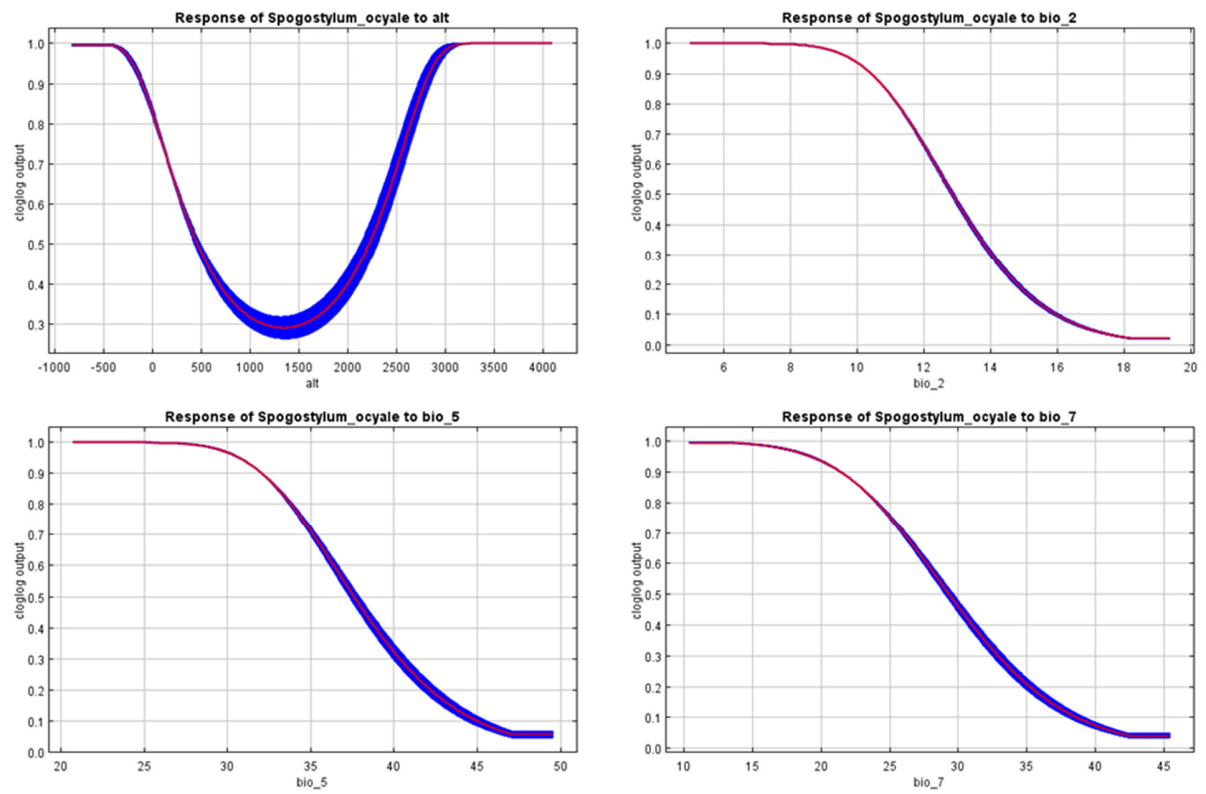

**Figure S1.** *Spogostylum ocyale* response curves in relation to bioclimatic predictors: values shown are average over ten replicate runs.
